# Supplementary material for: Structural details of monoclonal antibody m971 recognition of the membrane-proximal domain of CD22
Source: PubMed Central journal article supplement (PMC8353475; doi:10.1016/j.jbc.2021.100966), 2021-07-14
Supplement: mmc1.pdf [file mmc1.pdf]

## Supporting information

### Supporting Figure 1

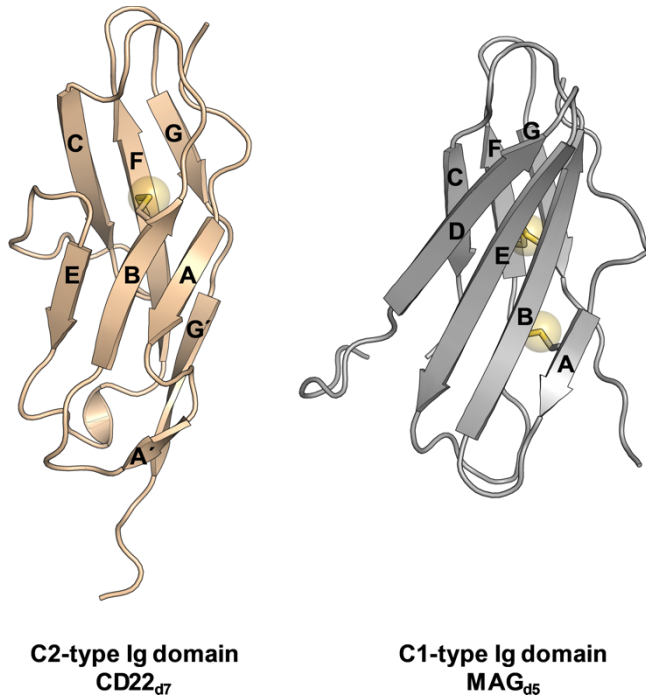

**Supporting Figure 1. Comparison of the three-dimensional structures of CD22 and MAG proximal Ig domains.** Crystal structures of d7 and d5 proximal Ig-like domains of CD22 and MAG, respectively. C1- and C2-type Ig folding contain different  $\beta$ -strand topology of strands D and C'.

## Supporting Figure 2

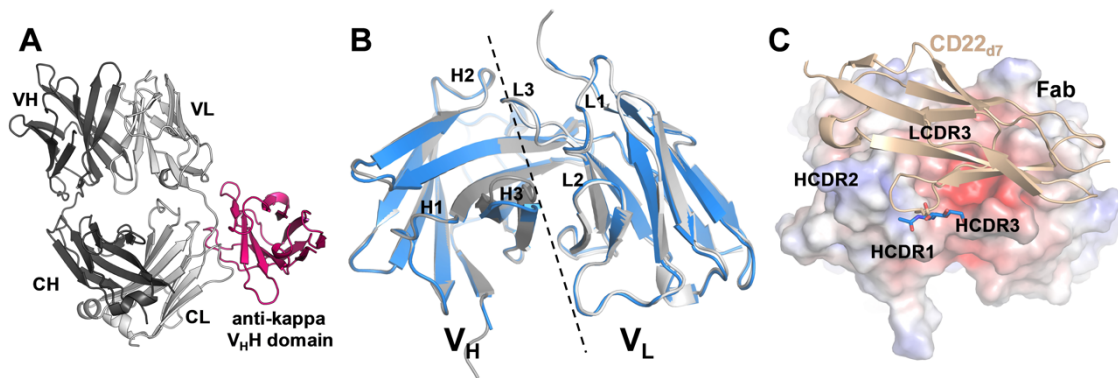

**Supporting Figure 2. Variable region of m971 Fab.** A) Crystal structure of m971 Fab (grey) in complex with the anti-kappa V<sub>H</sub>H domain (magenta). The anti-kappa V<sub>H</sub>H domain interacts with the Fab constant region of the light chain (CL). B) Superposition of the crystal structures of the variable domain of m971 Fab unliganded (in blue) and CD22-bound (grey). Except for the HCDR3 loop, no significant changes are observed in the CDRs, indicating that m971 is largely in a predisposed conformation to bind CD22 d7. C) Electrostatic surface representation of the m971 paratope. The d7 domain of CD22 is shown as wheat secondary structure. The calculation of the surface electrostatics was made with the APBS software (1) and prepared using Pymol (2) and displayed on a scale of -5 kT/e (red) to 5 kT/e (blue).

### Supporting Figure 3

Figure S3

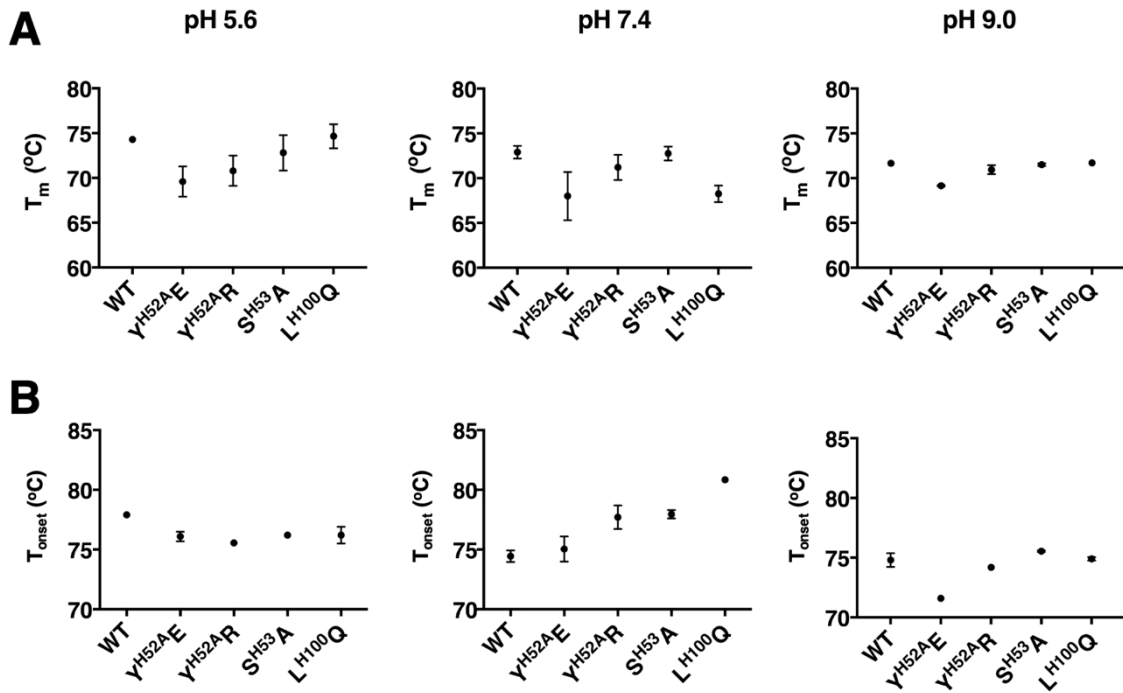

**Supporting Figure 3. Thermal stability of WT and mutant m971 Fabs at different pH's.** A) Melting temperature ( $T_m$ ) calculated from intrinsic fluorescence. B) Onset aggregation temperature ( $T_{onset}$ ) calculated from static light scattering.

#### Supporting Figure 4

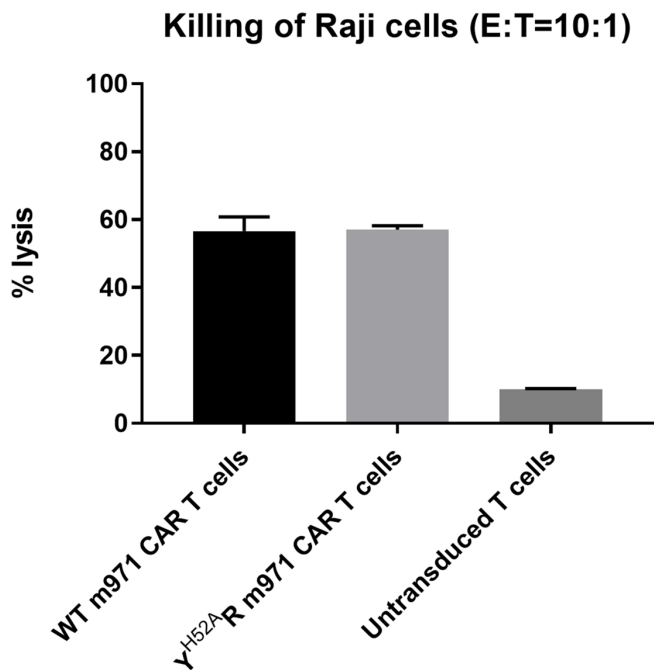

**Supporting Figure 4. Lysis of Raji cells by wild type (wt) and Y<sup>H52A</sup>R mutant m971 CAR-T cells.** WT m971 and Y<sup>H52A</sup>R m971 scFv were incorporated into the 2<sup>nd</sup> generation CAR with CD28 transmembrane domain and intracellular 4-1BB and CD3  $\zeta$  domain, which were expressed on Jurkat T cells surface by lentiviral-mediated transduction. CAR-T cell killing of Raji cells was detected by the Promega CytoTox-Glo™ Cytotoxicity Assay kit. Untransduced T cells were used as a negative control.

## Supporting Figure 5

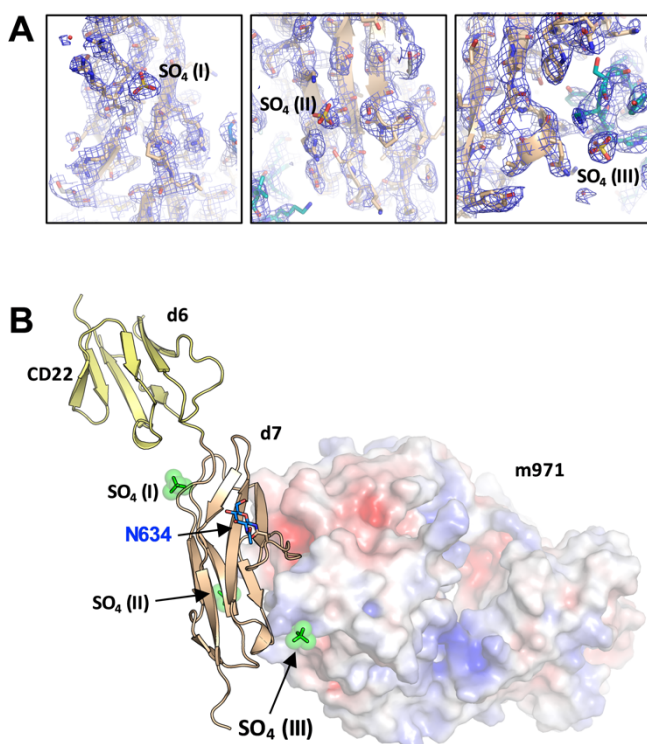

### Supporting Figure 5. Sulphate ions in the CD22<sub>d6-d7</sub>-m971 Fab co-crystal structure.

A) Representative electron density showing the sulphate ion sites I (left), II (middle) and III (right) on the surface of CD22 (in wheat color). The electron density was calculated from a composite omit map and contoured at  $1\sigma$ . B) Crystal structure of CD22<sub>d6-d7</sub> in complex with m971 Fab. Electrostatic surface of the m971 Fab is represented. SO<sub>4</sub> III is located at the interface between CD22 and m971. The calculation of the surface electrostatics was made with the APBS software (1) and prepared using Pymol (2) and displayed on a scale of -5 kT/e (red) to 5 kT/e (blue).



**Supporting Figure 6. Sequence alignment of CD22.** Amino acid sequence alignment of CD22 from human (hCD22), mouse (mCD22) and rat (rCD22). The red box indicates the putative heparan sulfate binding site, with XBBXB motif (X, aliphatic residues and B, amino acids R, K or H). Sequence alignment was done using the Clustal Omega software (3).

**Supporting Table 1. Residues involved in the m971-CD22 interaction. S= salt bridge; H= hydrogen bond.**

| Contact type | CD22 residue | BSA (Å <sup>2</sup> ) |
|--------------|--------------|-----------------------|
|              | P623         | 12                    |
|              | V624         | 10                    |
|              | S625         | 56                    |
| S            | H626         | 71                    |
|              | Y627         | 8                     |
| H            | T628         | 18                    |
| H            | D631         | 16                    |
|              | W632         | 35                    |
| H            | N633         | 11                    |
| H            | Q635         | 62                    |
|              | S636         | 28                    |
|              | L637         | 32                    |
| H            | P638         | 109                   |
| H            | Y639         | 70                    |
| HS           | H640         | 136                   |
| H            | S641         | 52                    |
|              | Q642         | 3                     |
|              | R645         | 11                    |
|              | L646         | 22                    |
| HS           | E647         | 65                    |
|              | P648         | 43                    |
|              | K650         | 15                    |
|              | Q652         | 36                    |
| H            | H653         | 57                    |
| H            | Y657         | 12                    |



|    |                        |                            |
|----|------------------------|----------------------------|
|    | <b>Total</b>           | <b>990</b>                 |
|    |                        |                            |
|    | <b>m971 HC residue</b> | <b>BSA (Å<sup>2</sup>)</b> |
| H  | N32                    | 32                         |
|    | A35                    | 1                          |
| H  | R50                    | 32                         |
| H  | Y52                    | 38                         |
|    | R52b                   | 78                         |
| H  | S53                    | 64                         |
|    | K54                    | 65                         |
| H  | W55                    | 25                         |
| H  | Y56                    | 99                         |
|    | N57                    | 37                         |
| H  | D58                    | 33                         |
|    | Y59                    | 28                         |
| HS | K64                    | 30                         |
|    | T97                    | 20                         |
|    | G98                    | 12                         |
| HS | D99                    | 74                         |
|    | L100                   | 26                         |
| HS | D100b                  | 28                         |
|    | <b>Total</b>           | <b>722</b>                 |
|    |                        |                            |
|    | <b>m971 LC residue</b> | <b>BSA (Å<sup>2</sup>)</b> |
|    | W30                    | 71                         |
| H  | Y32                    | 60                         |
|    | S91                    | 11                         |
| H  | Y92                    | 78                         |
|    | S93                    | 15                         |

|  |              |            |
|--|--------------|------------|
|  | 194          | 41         |
|  | <b>Total</b> | <b>276</b> |

### References

1. Unni, S., Huang, Y., Hanson, R. M., Tobias, M., Krishnan, S., Li, W. W., Nielsen, J. E., and Baker, N. A. (2011) Web servers and services for electrostatics calculations with APBS and PDB2PQR. *J. Comput. Chem.* 10.1002/jcc.21720
2. Schrödinger, L. (2015) The PyMol Molecular Graphics System, Versión 1.8. *Thomas Hold.* 10.1007/s13398-014-0173-7.2
3. Sievers, F., and Higgins, D. G. (2014) Clustal omega, accurate alignment of very large numbers of sequences. *Methods Mol. Biol.* 10.1007/978-1-62703-646-7\_6
